# Supplementary material for: Luminescence properties and energy transfer of novel Bi3+ and Mn2+-co-activated Y3Ga5O12 single-component white light-emitting phosphor
Source: Royal Society of Chemistry journal article supplement (doi:10.1039/d0tc02704a), 2020-01-01
Supplement: d0tc02704a1.pdf [file d0tc02704a1.pdf]

## Supporting information

### Luminescence Properties and Energy Transfer of A Novel Bi<sup>3+</sup> and Mn<sup>2+</sup>-coactivated Y<sub>3</sub>Ga<sub>5</sub>O<sub>12</sub> Single-component White Light-emitting Phosphor

Langping Dong,<sup>a, b</sup> Liang Zhang,<sup>a, b</sup> Yongchao Jia,<sup>c</sup> Baiqi Shao,<sup>a</sup> Shuang Zhao,<sup>a, b</sup>

and Hongpeng You<sup>a, b</sup>\*

<sup>a</sup> State Key Laboratory of Rare Earth Resource Utilization, Changchun Institute of Applied Chemistry, Chinese Academy of Sciences, Changchun 130022, P. R. China

<sup>b</sup> University of Science and Technology of China, Hefei 230026, P. R. China

<sup>c</sup> European Theoretical Spectroscopy Facility, Institute of Condensed Matter and Nanosciences, Université catholique de Louvain, Chemin des étoiles 8, bte L07.03.01, B-1348 Louvain-la-Neuve, Belgium

\*Corresponding author. Fax: +86 431 85698041. E-mail address: [hpyou@ciac.ac.cn](mailto:hpyou@ciac.ac.cn) (H.P. You).

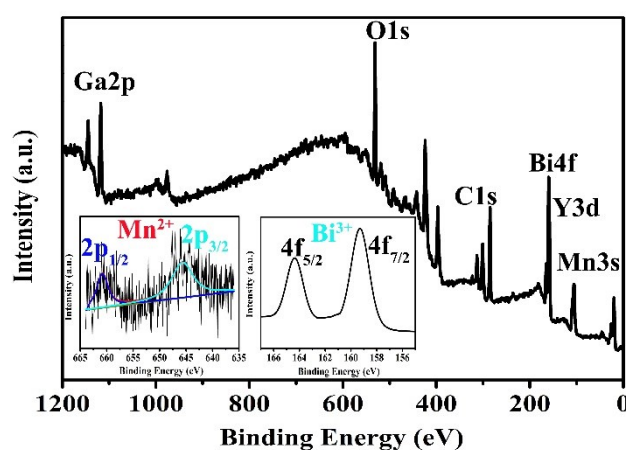

**Figure S1** XPS spectra of the YGO:0.01Bi<sup>3+</sup>,0.008Mn<sup>2+</sup> sample.

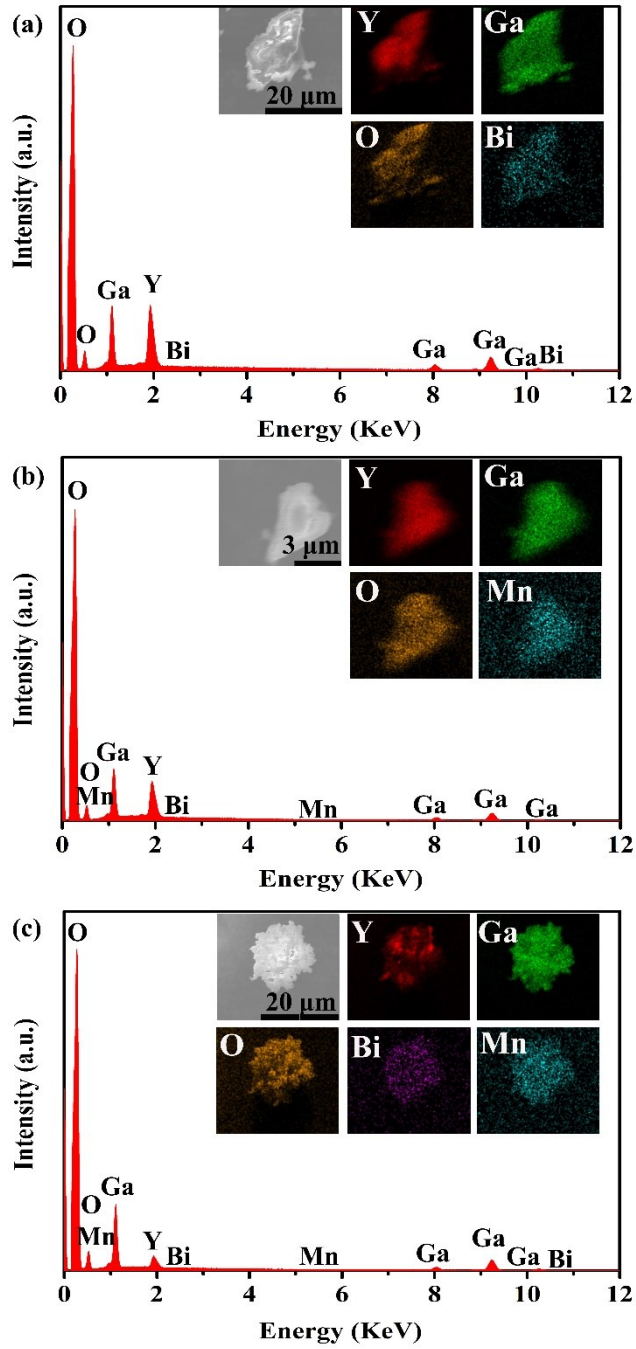

**Figure S2** EDS elemental mapping of YGO:0.01Bi<sup>3+</sup>, YGO:0.008Mn<sup>2+</sup> and YGO:0.01Bi<sup>3+</sup>,0.008Mn<sup>2+</sup> samples.

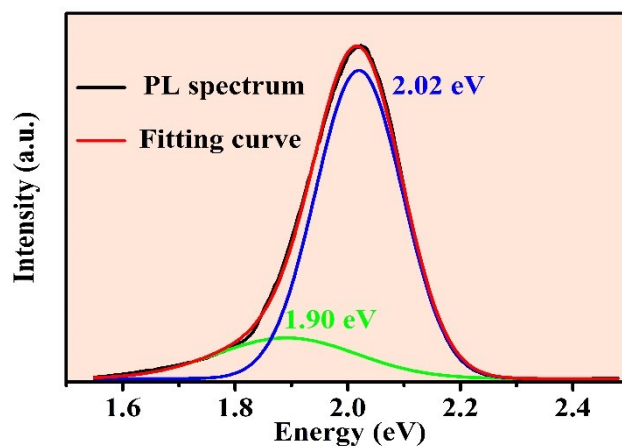

**Figure S3** PL spectrum of YGO:0.008Mn<sup>2+</sup> and Gaussian fitting curves.

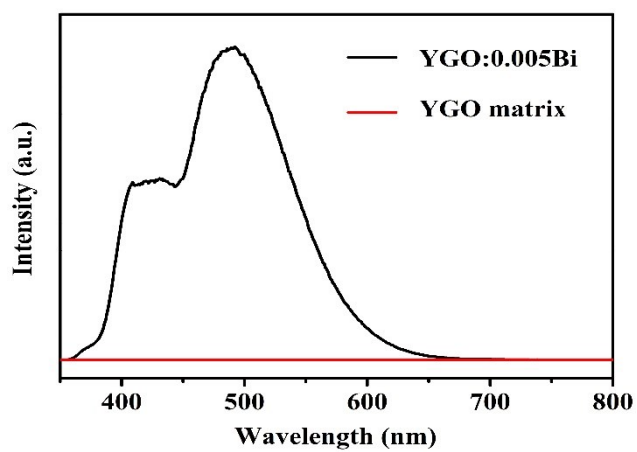

**Figure S4** The comparison of emission spectra between YGO matrix and YGO:0.005Bi<sup>3+</sup> sample.

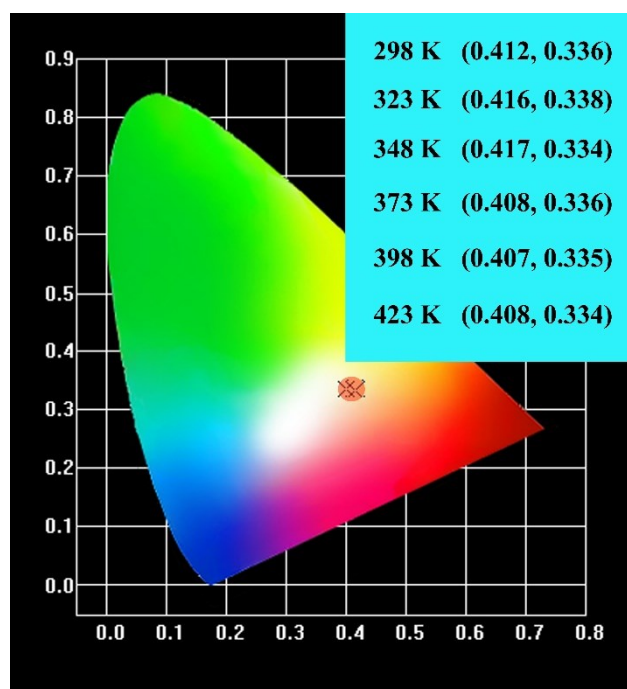

**Figure S5** Chromaticity coordinates of YGO:0.01Bi<sup>3+</sup>,0.008Mn<sup>2+</sup> sample in the range of 298-423 K.

**Table S1** Ionic radius of cations in the Y<sub>3</sub>Ga<sub>5</sub>O<sub>12</sub>:Bi<sup>3+</sup>,Mn<sup>2+</sup>.

| Radius (Å)/CN    | 4     | 6     | 8     |
|------------------|-------|-------|-------|
| Y <sup>3+</sup>  |       |       | 1.02  |
| Ga <sup>3+</sup> | 0.470 | 0.620 |       |
| Mn <sup>2+</sup> | 0.660 | 0.670 | 0.960 |
| Bi <sup>3+</sup> |       | 1.03  | 1.17  |
